# Supplementary material for: Stable Zr-based polyoxometalate as a green catalyst for selective oxidation of aniline
Source: Royal Society of Chemistry journal article supplement (doi:10.1039/d5cc06298e), 2025-12-03
Supplement: d5cc06298e1.pdf [file d5cc06298e1.pdf]

## Electronic Supplementary Information

### **Stable Zr-based polyoxometalate as a green catalyst for selective oxidation of aniline**

## Table of Contents

|                                                                    |    |
|--------------------------------------------------------------------|----|
| S1 General information.....                                        | 3  |
| S2 Preparation of compound .....                                   | 4  |
| S3 Crystallographic data and structure of compound .....           | 5  |
| S4 BVS results of W, Zr, P and O atoms.....                        | 7  |
| S5 Characterization data.....                                      | 8  |
| S5.1 IR spectra.....                                               | 8  |
| S5.2 UV spectra.....                                               | 9  |
| S5.3 PXRD patterns.....                                            | 10 |
| S5.4 TGA curve.....                                                | 10 |
| S5.5 XPS spectra.....                                              | 11 |
| S5.6 EDS mapping.....                                              | 12 |
| S6 Catalytic reaction.....                                         | 13 |
| S6.1 Process of catalytic oxidation of aniline.....                | 13 |
| S6.2 Additional figures about catalysis.....                       | 13 |
| S6.2.1 MS analysis .....                                           | 13 |
| S6.2.2 GC spectra .....                                            | 14 |
| S6.2.3 UV spectra .....                                            | 16 |
| S6.2.4 Conversion and selectivity under different conditions ..... | 17 |
| S6.2.5 GC spectra.....                                             | 18 |
| S6.2.6 Gram scale synthesis.....                                   | 22 |
| S6.2.7 Scope of the <b>Zr-W</b> for oxidation of aniline.....      | 22 |
| S7 Mechanistic studies.....                                        | 23 |
| S8 Reference.....                                                  | 25 |

## S1 General information

Sodium tungstate dihydrate ( $\text{Na}_2\text{WO}_4 \cdot 2\text{H}_2\text{O}$ ) was obtained from Tianjin Kemio Chemical Reagent Co. LTD. Aniline ( $\text{C}_6\text{H}_7\text{N}$ ), zirconyl chloride octahydrate ( $\text{ZrClO}_2 \cdot 8\text{H}_2\text{O}$ ), tetrahydrofuran (THF), tetramethylammonium chloride ( $\text{C}_4\text{H}_{12}\text{NCl}$ ), sodium carbonate ( $\text{Na}_2\text{CO}_3$ ), acetonitrile ( $\text{CH}_3\text{CN}$ ), p-fluoro aniline ( $\text{C}_6\text{H}_6\text{FN}$ ), p-bromoaniline ( $\text{C}_6\text{H}_6\text{BrN}$ ), p-methoxyaniline ( $\text{C}_7\text{H}_9\text{NO}$ ), p-chloroaniline ( $\text{C}_6\text{H}_6\text{ClN}$ ), p-aminotoluene ( $\text{C}_7\text{H}_9\text{N}$ ), m-toluidine ( $\text{C}_7\text{H}_9\text{N}$ ), o-toluidine ( $\text{C}_7\text{H}_9\text{N}$ ), 2-ethylaniline ( $\text{C}_8\text{H}_{11}\text{N}$ ) were purchased from Shanghai Macklin Biochemical Technology Co., LTD. Acetic acid ( $\text{CH}_3\text{COOH}$ ), potassium chloride (KCl), phosphoric acid ( $\text{H}_3\text{PO}_4$ ), dichloromethane, 1, 2-dichloroethane were purchased from Xilong Scientific Co., Ltd. Ammonium chloride ( $\text{NH}_4\text{Cl}$ ), methanol ( $\text{CH}_3\text{OH}$ ), sodium acetate ( $\text{CH}_3\text{COONa}$ ), acetone, DMF, ethyl alcohol and ethyl acetate was purchased from Shanghai Lingfeng Chemical Reagent Co., LTD. Hydrogen peroxide 30% aqueous solution was purchased from Shanghai Wokai Biotechnology Co., Ltd. All chemicals were of analytical grade and used as received without further purification.

FT-IR spectra were measured by using a Nicolet IS10 FT-IR spectrometer in the  $450\text{--}4000\text{ cm}^{-1}$  region with KBr pallets. Energy-dispersive X-ray spectroscopy (EDS) measurement was performed on a Regulus8100 scanning electron microscope. Powder X-ray diffraction (PXRD) patterns were recorded on the Rigaku MiniFlex and Rigaku Ultima IV with Cu  $K\alpha$  radiation ( $\lambda = 1.54056\text{ \AA}$ ) in the  $2\theta$  range of  $5\text{--}55^\circ$ , respectively. Thermogravimetric analysis (TGA) was carried out under  $\text{N}_2$  atmosphere from  $32\text{ }^\circ\text{C}$  to  $1000\text{ }^\circ\text{C}$  with a heating rate of  $10\text{ }^\circ\text{C}/\text{min}$  on the Netzsch TG 209 F3 Tarsus analyzer. The solid-state diffuse reflectance absorption spectra were recorded on a 2600 UV/vis spectrophotometer with an integrating sphere attachment and  $\text{BaSO}_4$  as reference. The liquid absorption spectroscopy was recorded on a 759 UV/vis spectrometer using a quartz cuvette with a 1 cm long optical pathway. XPS spectra were measured on a Thermo Scientific ESCALAB Xi+ X-ray photoelectron spectrometer.

## S2 Preparation of compound

### S2.1 Synthesis of $\text{Na}_9[\alpha\text{-PW}_9\text{O}_{34}]\cdot 7\text{H}_2\text{O}$ (**Na-PW<sub>9</sub>**)

The **Na-PW<sub>9</sub>** was synthesized according to the literature and characterized by FT-IR [S1]. The detailed process is as follows: 120 g  $\text{Na}_2\text{WO}_4\cdot 2\text{H}_2\text{O}$  (0.26 mol) was dissolved in distilled water (120 mL). Under vigorous stirring,  $\text{H}_3\text{PO}_4$  (4 mL) and  $\text{CH}_3\text{COOH}$  (22.5 mL) were added to the above solution, respectively. Then, the solution began to turn cloudy and produced a large amount of white precipitate. After stirring for 1 h, the white precipitate was filtered and dried at room temperature to obtain **Na-PW<sub>9</sub>**.

### S2.2 Synthesis of Compound

0.51 g **Na-PW<sub>9</sub>** (0.2 mmol), 0.13 g  $\text{ZrOCl}_2\cdot 8\text{H}_2\text{O}$  (0.4 mmol), 0.15 g  $(\text{CH}_3)_4\text{NCl}$  (1.37 mmol), 0.15 g KCl (2 mmol), 0.11 g  $\text{NH}_4\text{Cl}$  (2 mmol), 0.064 g  $\text{Na}_2\text{CO}_3$  (0.6 mmol) were dissolved in 10 mL of  $0.5\text{ mol}\cdot\text{L}^{-1}$  NaAc-HAc buffer (pH = 4.5) and were stirred for 1 h. Then, the mixture was sealed in a 20 mL Teflon-lined steel autoclave at 180 °C for 12 h. After several days, it was cooled to room temperature, and the colorless square block crystals were obtained (Scheme S1). Yield: 0.15 g (29.34% based on **Na-PW<sub>9</sub>**). Elemental analyses calcd. for  $\text{C}_{36}\text{H}_{131}\text{N}_9\text{P}_2\text{W}_{18}\text{O}_{81}\text{Zr}_3$  (%): H, 2.34; C 7.68; N 2.24; Zr, 4.86; P, 1.10; W, 58.76. Found: H, 1.95; C 7.80; N 2.02; Zr, 5.11; P, 1.00; W, 61.72. IR (KBr pellet,  $\text{cm}^{-1}$ ): 3463(vs), 1076 (vs), 1022(vs), 948(vs), 897(vs), 877(vs), 756(vs), 695(vs), 521(vs).

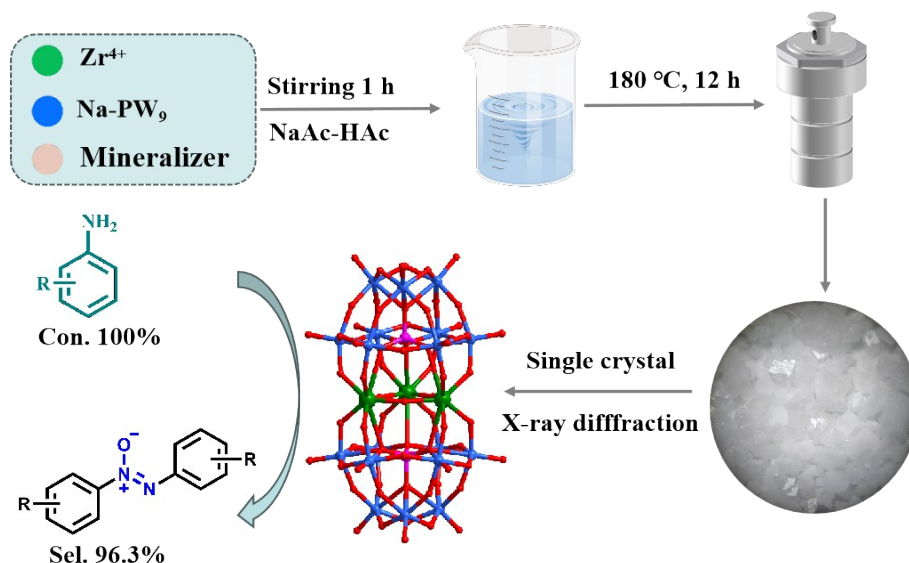

**Scheme S1.** Synthesis of **Zr-W** via temperature and regulation mechanism of mineralizer for its utilization in thermal-catalytic aniline oxidation to AOB.

### S3 Crystallographic data and structure of compound

Crystal X-ray diffraction was made on a hybrid pixel array detector with micro-focus metal jet ( $\lambda = 1.3405 \text{ \AA}$ ) at 100 K. The structure was solved with the SHELXT structure solution program using intrinsic phasing and refined with the SHELXL [S2,S3]. Hydrogen atoms were obtained through theoretical hydrogenation, and the number of crystal water was determined through thermogravimetric analysis. The CCDC numbers are 2495653.

Table S1 Crystallographic data of compound **Zr-W**

| Compound <b>Zr-W</b>                           |                                                                                    |
|------------------------------------------------|------------------------------------------------------------------------------------|
| Empirical formula                              | $\text{C}_6\text{N}_{1.5}\text{O}_{11.92}\text{P}_{0.33}\text{W}_3\text{Zr}_{0.5}$ |
| Formula weight                                 | 891.193                                                                            |
| Temperature/K                                  | 100.00(10)                                                                         |
| Crystal system                                 | Trigonal                                                                           |
| Space group                                    | R-3m                                                                               |
| a/ $\text{\AA}$                                | 22.6915(1)                                                                         |
| b/ $\text{\AA}$                                | 22.6915(1)                                                                         |
| c/ $\text{\AA}$                                | 39.2399(2)                                                                         |
| $\alpha/^\circ$                                | 90                                                                                 |
| $\beta/^\circ$                                 | 90                                                                                 |
| $\gamma/^\circ$                                | 120                                                                                |
| Volume/ $\text{\AA}^3$                         | 17497.86(14)                                                                       |
| Z                                              | 36                                                                                 |
| $\rho_{\text{calc}}/\text{cm}^3$               | 3.045                                                                              |
| $\mu/\text{mm}^{-1}$                           | 23.925                                                                             |
| F(000)                                         | 13262.1                                                                            |
| Crystal size/ $\text{mm}^3$                    | $0.3 \times 0.2 \times 0.2$                                                        |
| Radiation                                      | micro-focus metaljet ( $\lambda = 1.34050 \text{ \AA}$ )                           |
| 2 $\Theta$ range for data collection/ $^\circ$ | 4.38 to 109.98                                                                     |
| Index ranges                                   | $-28 \leq h \leq 29$ , $-28 \leq k \leq 27$ , $-50 \leq l \leq 50$                 |
| Reflections collected                          | 126048                                                                             |
| Independent reflections                        | 4006 [ $R_{\text{int}} = 0.0924$ , $R_{\text{sigma}} = 0.0193$ ]                   |
| Data/restraints/parameters                     | 4006/78/253                                                                        |
| Goodness-of-fit on $F^2$                       | 1.032                                                                              |
| Final R indexes [ $I \geq 2\sigma(I)$ ]        | $R_1 = 0.0347$ , $wR_2 = 0.0860$                                                   |
| Final R indexes [all data]                     | $R_1 = 0.0355$ , $wR_2 = 0.0866$                                                   |
| Largest diff. peak/hole / $e \text{ \AA}^{-3}$ | 2.56/-1.58                                                                         |

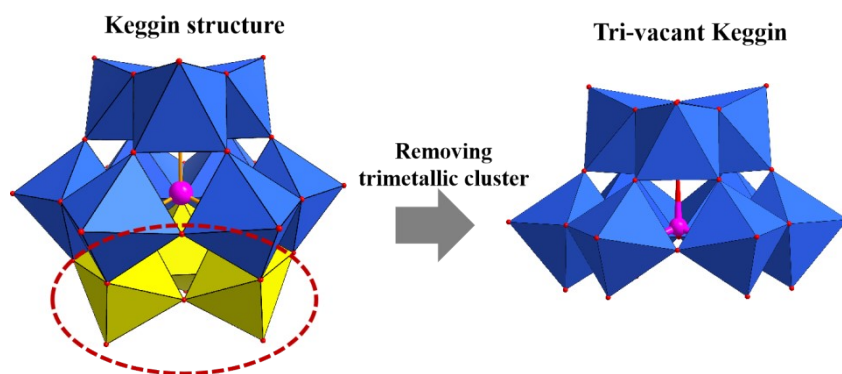

Fig. S1 Formation of tri-vacant Keggin.

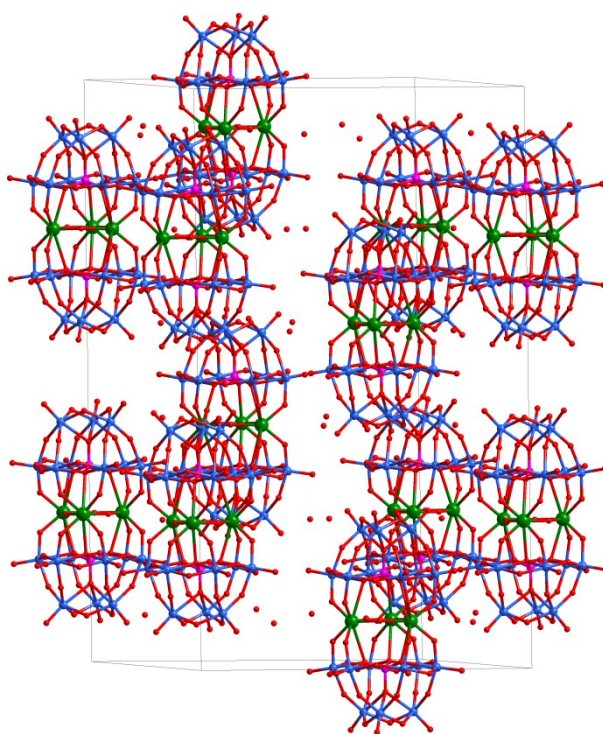

Fig. S2 Packing mode of compound.

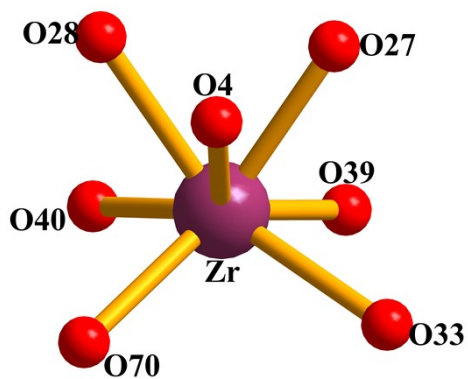

Fig. S3 Coordination environment of Zr ion.

#### S4 BVS results of W, Zr, P and O atoms

Table S2 BVS results of W, Zr, P and O atoms.

| Atom label | BVS value | Atom label | BVS value | Atom label | BVS value |
|------------|-----------|------------|-----------|------------|-----------|
| W1         | 6.28      | O3         | 2.04      | O12        | 1.00      |
| W2         | 6.23      | O4         | 1.93      | O13        | 1.70      |
| W3         | 6.22      | O5         | 1.71      | O14        | 2.06      |
| W4         | 6.22      | O6         | 2.02      | O15        | 2.07      |
| Zr         | 3.84      | O7         | 2.06      | O16        | 1.96      |
| P1         | 4.73      | O8         | 1.48      | O17        | 2.01      |
| P2         | 4.83      | O9         | 1.93      | O18        | 1.94      |
| O1         | 1.74      | O10        | 1.40      | O19        | 1.75      |
| O2         | 1.95      | O11        | 1.93      |            |           |

## S5 Characterization data

### S5.1 IR spectra

The bonding mode of POM precursor  $\text{Na}_9[\text{PW}_9\text{O}_{34}] \cdot 7\text{H}_2\text{O}$  (**Na-PW<sub>9</sub>**) and compound **Zr-W** were tested by IR (Fig. S4). The broad absorption peak of **Na-PW<sub>9</sub>** at  $3442\text{ cm}^{-1}$  is assigned to characteristic absorption peak of water molecules. There are obvious characteristic peaks in the range of  $1035\sim 1014\text{ cm}^{-1}$ , which is caused by  $\nu(\text{P-O}_a)$  stretching vibration. The characteristic peak at  $962\text{ cm}^{-1}$  is attributed to  $\nu(\text{W=O}_t)$  stretching vibration while the peaks at  $908\text{ cm}^{-1}$  and in the range of  $786\sim 732\text{ cm}^{-1}$  are attributed to  $\nu(\text{W-O-W})$  stretching vibration. These peaks are consistent with the IR of **Na-PW<sub>9</sub>** reported in the literature [S1]. The peak of compound at  $948\text{ cm}^{-1}$  is attributed to  $\nu(\text{W=O}_t)$  stretching vibration while the peaks at  $521\text{ cm}^{-1}$ ,  $695\text{ cm}^{-1}$ ,  $756\text{ cm}^{-1}$ ,  $877\text{ cm}^{-1}$  and  $897\text{ cm}^{-1}$  are attributed to  $\nu(\text{W-O-W})$  stretching vibrations. Meanwhile, the peaks at  $1022\text{ cm}^{-1}$  and  $1076\text{ cm}^{-1}$  are caused by  $\nu(\text{P-O})$  stretching vibration, and the peak at  $3463\text{ cm}^{-1}$  belongs to  $\nu(\text{O-H})$  stretching vibration. Compared with the **Na-PW<sub>9</sub>**, the peaks attributable to the  $\nu(\text{W-O-W})$  and  $\nu(\text{W=O}_t)$  show obvious shift, which may result from the strong coordination between **Na-PW<sub>9</sub>** and Zr atoms. Furthermore, compound has an absorption peak at  $1485\text{ cm}^{-1}$  attributed to  $\nu(\text{C-H})$  bending vibration and a peak at  $3037\text{ cm}^{-1}$  attributed to  $\nu(\text{C-H})$  stretching vibration, which is caused by the presence of tetramethylammonium chloride.

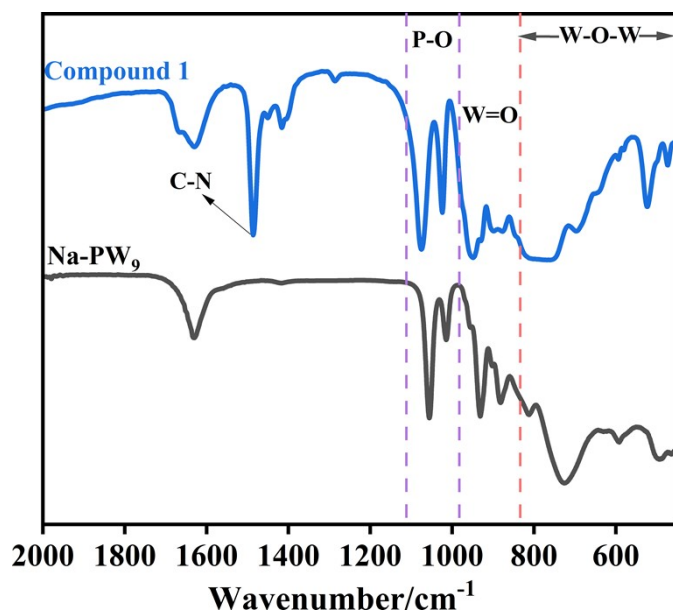

Fig. S4 IR spectra of **Na-PW<sub>9</sub>** and Compound **Zr-W**.

## S5.2 UV spectra

To understand the UV absorption of compound **Zr-W**, the UV spectra were tested. Fig. S5 shows that compound has two peaks at 247 nm and 284 nm, which are attributed to the charge transfer transitions of  $O \rightarrow W$ . Compared with **Na-PW<sub>9</sub>**, the wavelength corresponding to the peak of maximum absorption has shifted, which might be due to the coordination effect of zirconium.

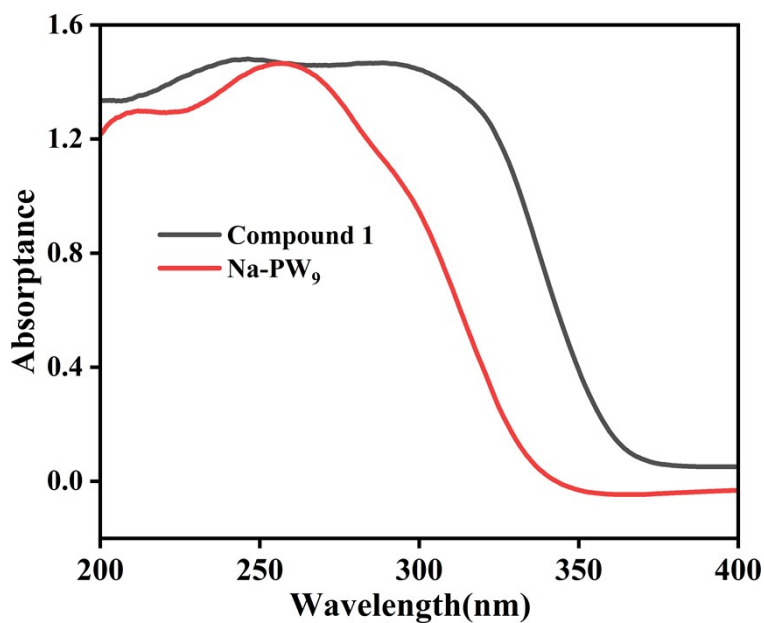

Fig. S5 UV spectra of compound **Zr-W** and **Na-PW<sub>9</sub>**

### S5.3 PXRD patterns

The PXRD pattern of compound is in good consistence with the simulated PXRD pattern from single-crystal X-ray diffraction, indicating good phase purity of compound (Fig. S6).

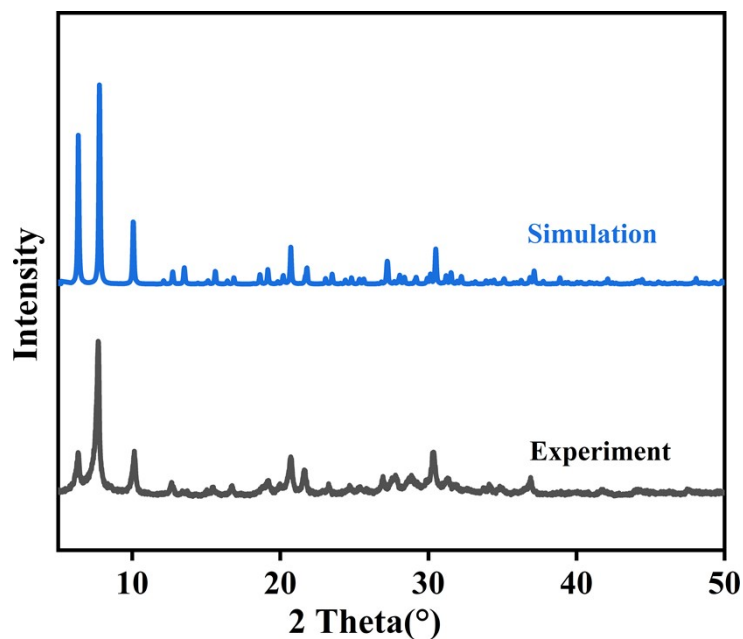

Fig. S6 Simulated and experimental PXRD patterns of compound.

### S5.4 TGA curve

To confirm the number of crystal water molecules, TGA curve was tested. As shown in Fig. S7, the TGA curve exhibits two steps of weight loss for compound 1 in the range of 35-800 °C. The total weight loss rate is 16.0%, which is attributed to the sublimation of crystal water, organic molecules, and phosphorus pentoxide. The first step of weight loss is in the range of 35-150 °C. The weight loss of this step is about 3.3%, which is attributed to the loss of crystal water. Therefore, it can be concluded that the number of crystal water in compound **Zr-W** is about ten. The second step of weight loss is in the range of 380-800 °C. The weight loss of this step is about 12.7 %, corresponding to the loss of the organic cations in the form of carbon oxides, water, and nitrogen oxides and the sublimation of P<sub>2</sub>O<sub>5</sub> (calcd. 14.85%).

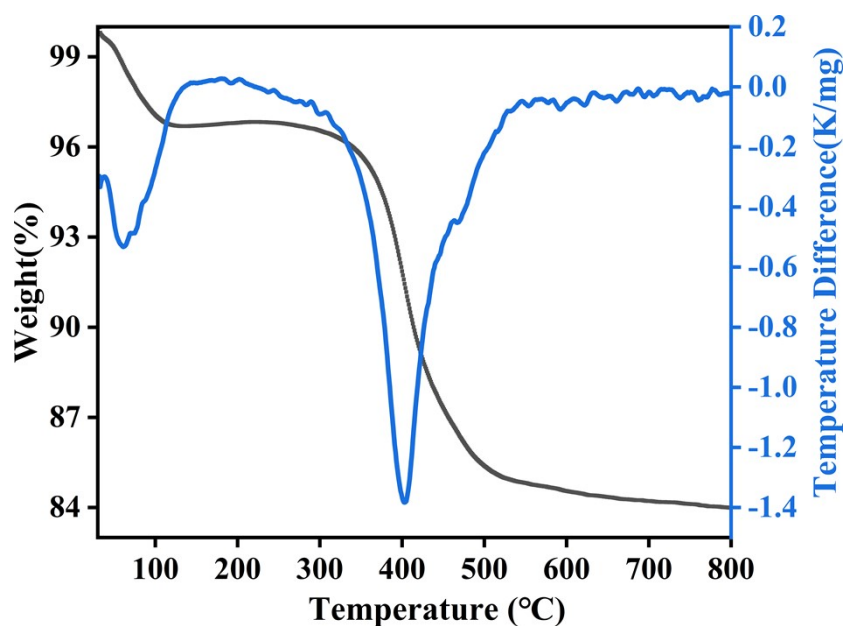

Fig. S7 TGA curve of of compound **Zr-W**.

### S5.5 XPS spectra

The valence state and chemical environment of each element in compound **Zr-W** was assessed by XPS. As shown in Fig. S8, compound **Zr-W** contains six elements, which is consistent with the results of X-ray single crystal diffraction analysis. The characteristic peaks at 184.5 eV and 182.0 eV are assigned to Zr 3d, respectively [S4,S5]. The peaks at 37.3 eV and 35.1 eV are assigned to the hexavalent W 4f 5/2 and W 4f 7/2, respectively [S6, S7], and the peak at 133.3 eV is attributed to the electron binding energy of pentavalent P 2p [S8]. The results indicated that the valence states of Zr, W, P were +4, +6, and +5, respectively, in accordance with BVS calculation. The characteristic peak at 286.1 eV is attributed to the C-H bond, while the characteristic peak at the lower binding energy of 284.6 eV is attributed to the C-N bond [S9]. The characteristic peak at the binding energy of 402.2 eV is attributed to the -N+- bond [S10].

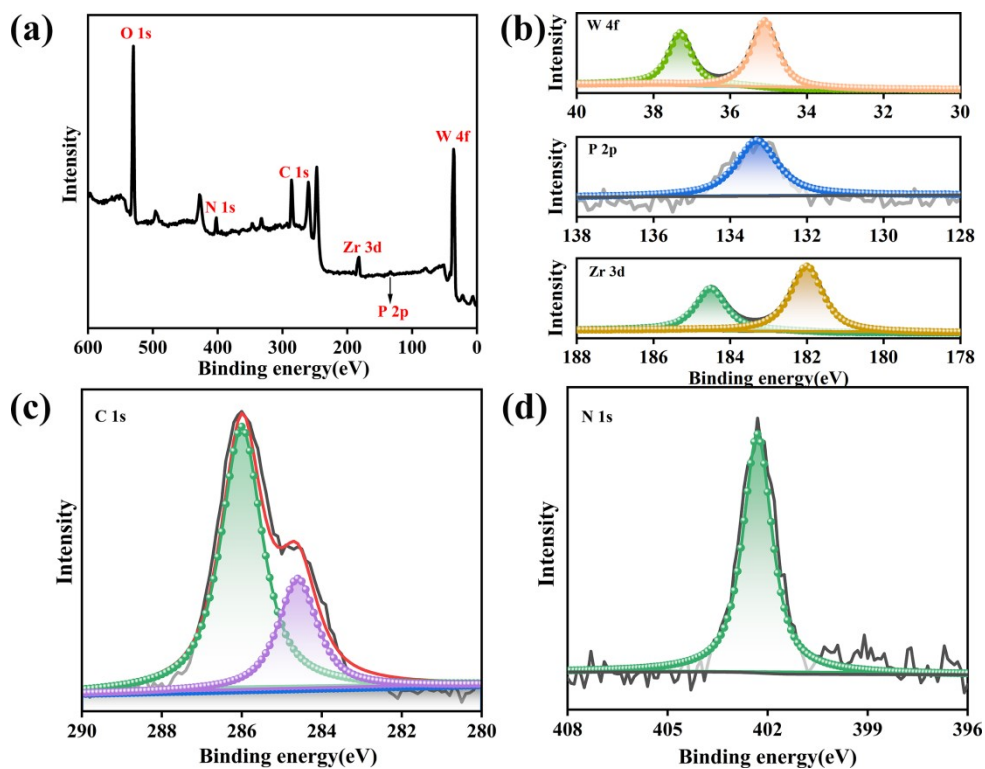

Fig. S8 XPS full-spectra of compound and high resolution XPS of W, P, Zr, C, N.

### S5.6 EDS mapping

The distributions of elements were observed by SEM-EDS mapping, indicating the existence of Zr, W and P elements (Fig. 9a-c).

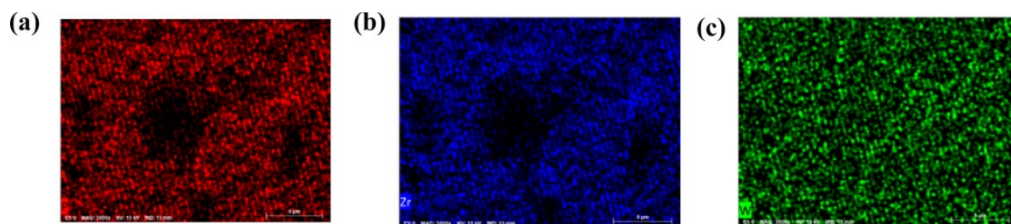

Fig. S9 EDS mapping of Zr, W and P elements on Zr-W catalyst.

## S6 Catalytic reaction

### S6.1 Process of catalytic oxidation of aniline

It is known that the products of the oxidation of aniline are light-sensitive. The reaction was carried out under light-shielding conditions. Aniline (2.0 mmol) is mixed with H<sub>2</sub>O (6.0 mL) in a quartz tube, followed by the addition of catalyst (**Zr-W**, x wt% based on aniline) and 30% H<sub>2</sub>O<sub>2</sub> aqueous solution. The reaction mixture is then stirred at 700 rpm at designated temperature and time. After the reaction, the obtained dark brown mixture was directly extracted by methanol and for UV spectroscopic and GC-MS (GCTRACE 1300; Agilent 7890B-7000C) analysis. The catalyst was isolated from solution via centrifugation and washed by methanol. And they were employed again to verify the capability for recyclability.

### S6.2 Additional figures about catalysis

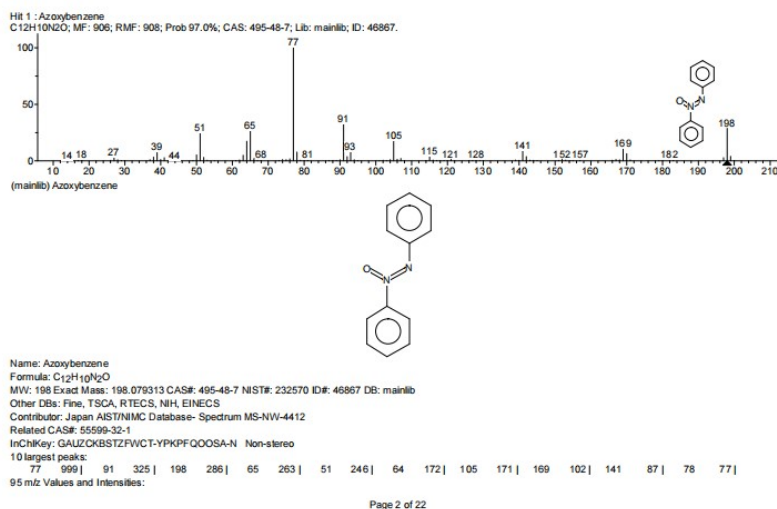

Fig. S10 MS analysis of azoxybenzene

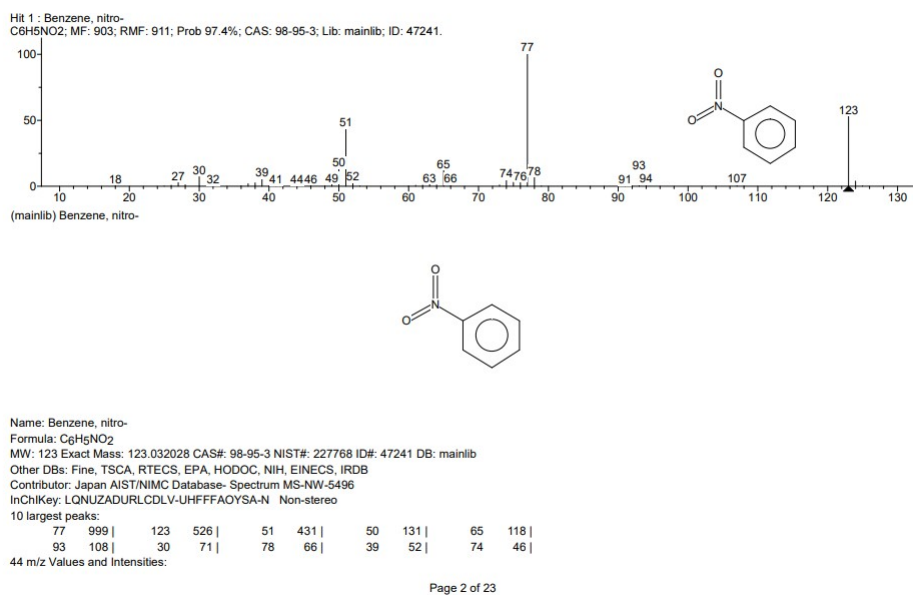

Fig. S11 MS analysis of nitrobenzene

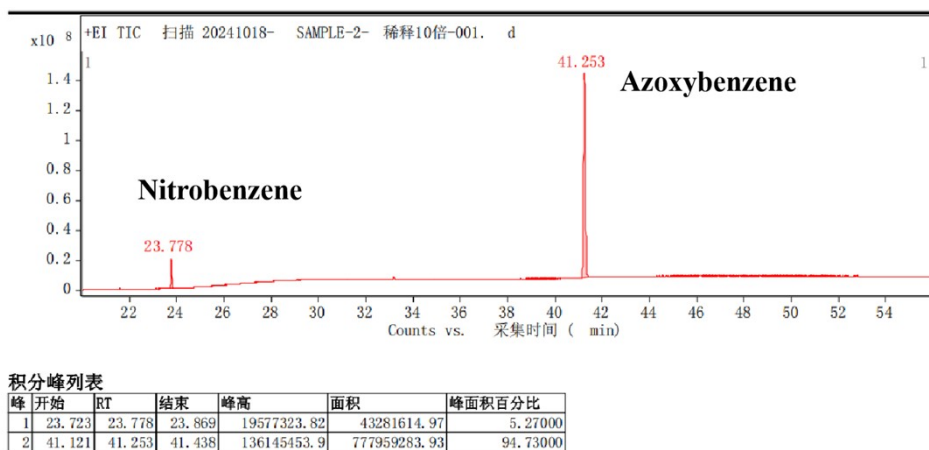

Fig. S12 GC spectra under the optimal catalytic conditions (entry 1, Table 1)

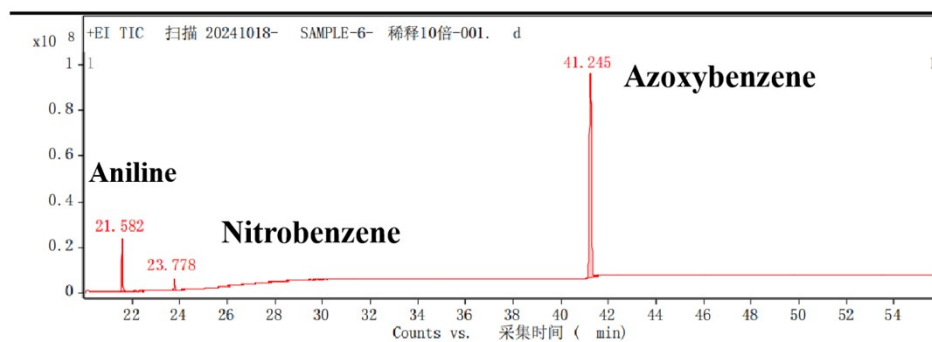

积分峰列表

| 峰 | 开始     | RT     | 结束     | 峰高          | 面积           | 峰面积百分比   |
|---|--------|--------|--------|-------------|--------------|----------|
| 1 | 21.529 | 21.582 | 21.717 | 22772013.71 | 53114327.79  | 9.28000  |
| 2 | 23.72  | 23.778 | 23.858 | 5092022.57  | 11727944.51  | 2.05000  |
| 3 | 41.114 | 41.245 | 41.433 | 89179669.83 | 507532654.21 | 88.67000 |

Fig. S13 GC spectra without catalyst (entry 2, Table 1)

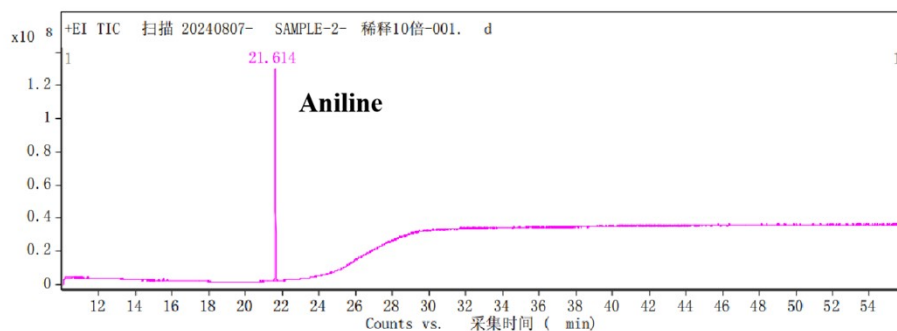

积分峰列表

| 峰 | 开始     | RT     | 结束     | 峰高          | 面积           | 峰面积百分比   |
|---|--------|--------|--------|-------------|--------------|----------|
| 1 | 10.123 | 10.173 | 10.519 | 690128.85   | 10128186.12  | 3.41000  |
| 2 | 21.56  | 21.614 | 21.727 | 127381608.1 | 286538180.29 | 96.59000 |

Fig. S14 GC spectra without H<sub>2</sub>O<sub>2</sub> (entry 3, Table 1)

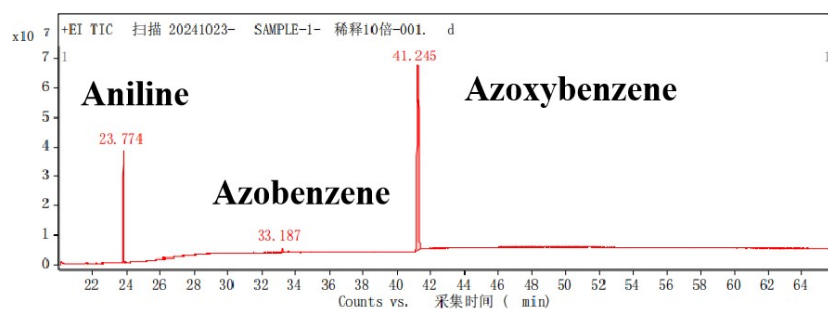

| 峰 | 开始     | RT     | 结束     | 峰高          | 面积           | 峰面积百分比   |
|---|--------|--------|--------|-------------|--------------|----------|
| 1 | 23.72  | 23.774 | 23.876 | 37872877.31 | 82273318.33  | 19.02000 |
| 2 | 33.119 | 33.187 | 33.288 | 1507603.55  | 5916795.36   | 1.37000  |
| 3 | 41.11  | 41.245 | 41.394 | 62714187.64 | 344345157.84 | 79.61000 |

Fig. S15 GC spectra using Na-PW<sub>9</sub> as catalyst (entry 5, Table 1)

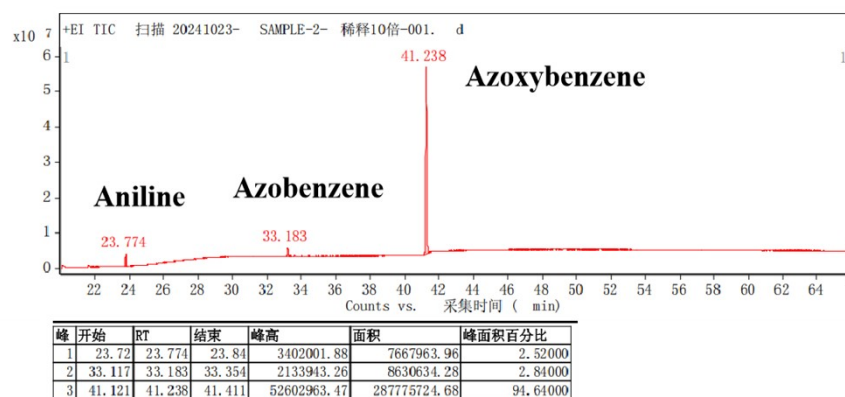

Fig. S16 GC spectra using  $\text{ZrOCl}_2$  as catalyst (entry 6, Table 1)

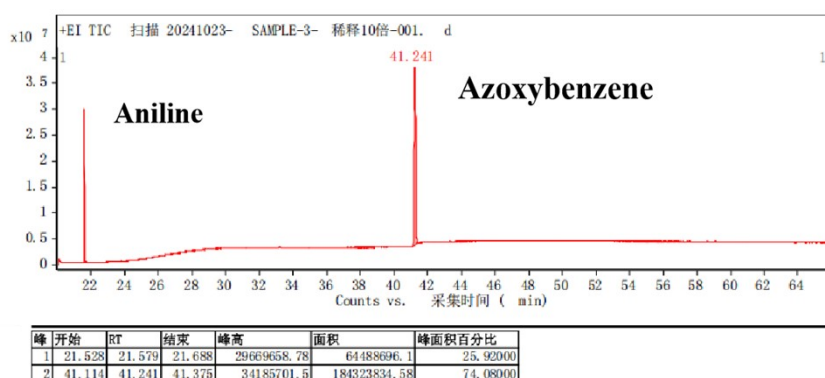

Fig. S17 GC spectra using TBHP (entry 4, Table 1)

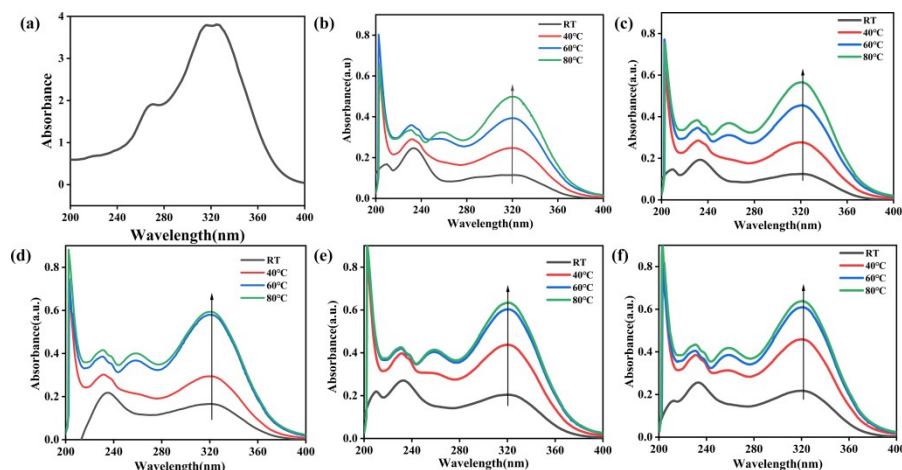

Fig. S18 UV spectra of azoxybenzene and the catalytic product with different reaction times: (a) azoxybenzene; (b) 6 h; (c) 8 h; (d) 10 h; (e) 12 h; (f) 14 h.

The UV spectra of azoxybenzene and the catalytic product are shown in Fig. S18. Compared with azoxybenzene, the catalytic products show similar absorbance peaks,

indicating the formation of azoxybenzene. Besides, under the same reaction time, the intensity of the peak increases with the rise in temperature, indicating that the content of azoxybenzene increases. Likewise, as the reaction time prolongs, the content of azoxybenzene also shows an increasing trend.

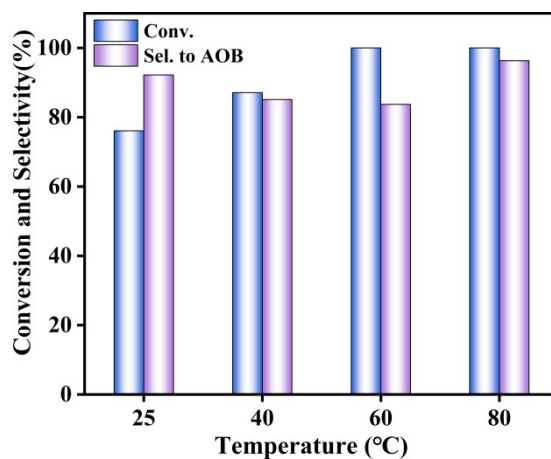

Fig. S19 Conversion of aniline and selectivity to AOB at different reaction temperature

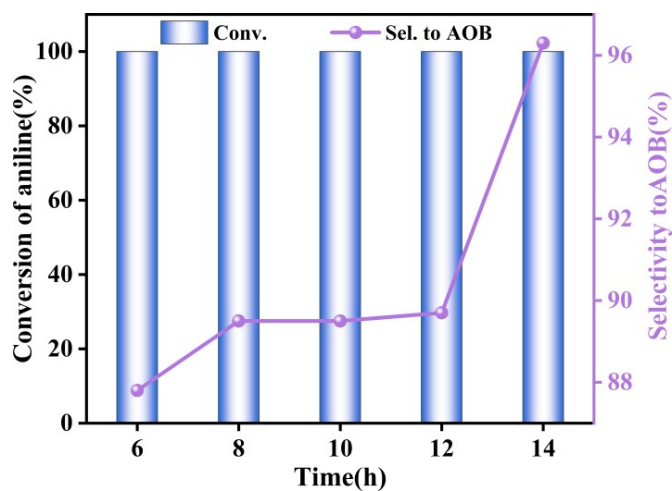

Fig. S20 Conversion of aniline and selectivity to AOB at different reaction times

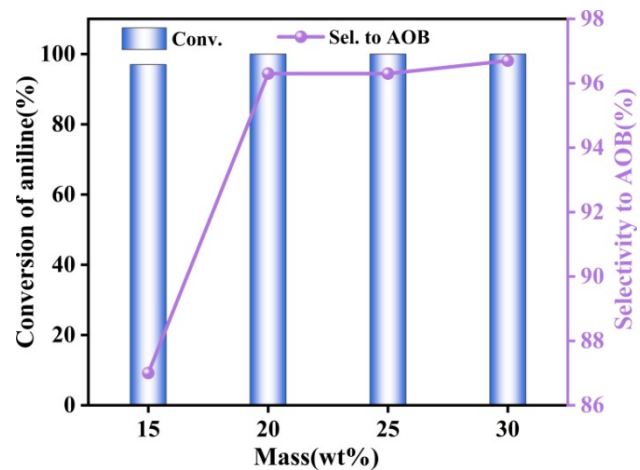

Fig. S21 Conversion of aniline and selectivity to AOB with different dosage of catalyst

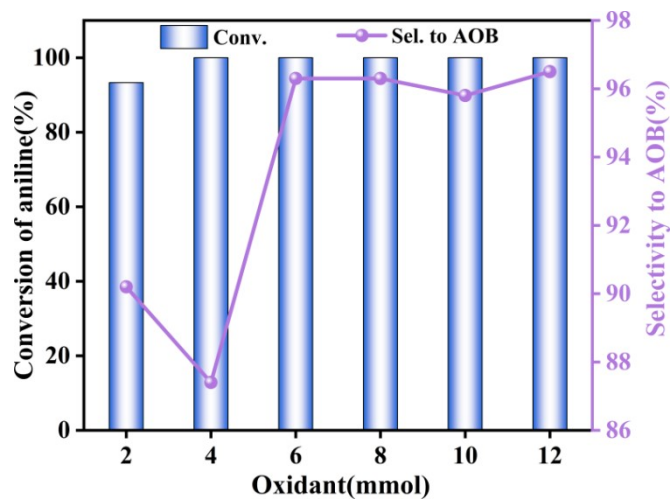

Fig. S22 Conversion of aniline and selectivity to AOB with different dosage of oxidant.

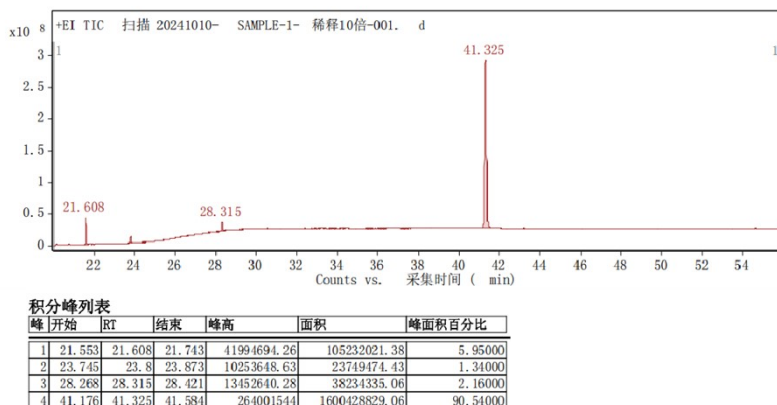

Fig. S23 GC spectra using DMF as solvent (entry 7, Table 1)

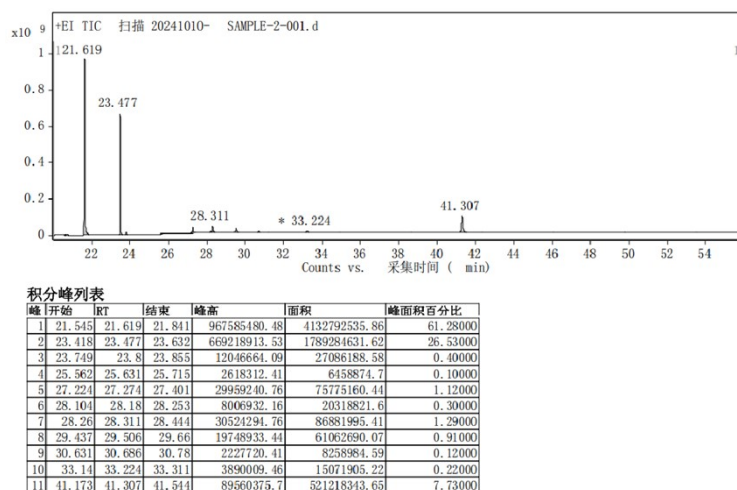

Fig. S24 GC spectra using acetone as solvent (entry 8, Table 1)

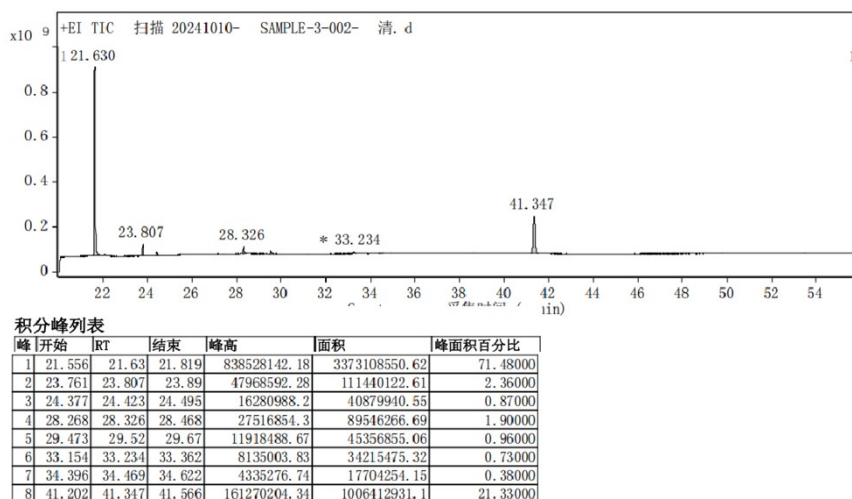

Fig. S25 GC spectra using DCM as solvent (entry 9, Table 1)

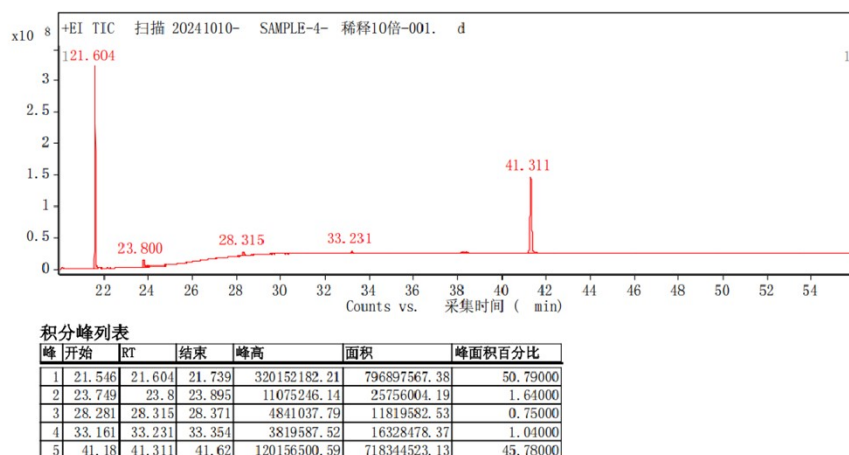

Fig. S26 GC spectra using EtOH as solvent (entry 10, Table 1)

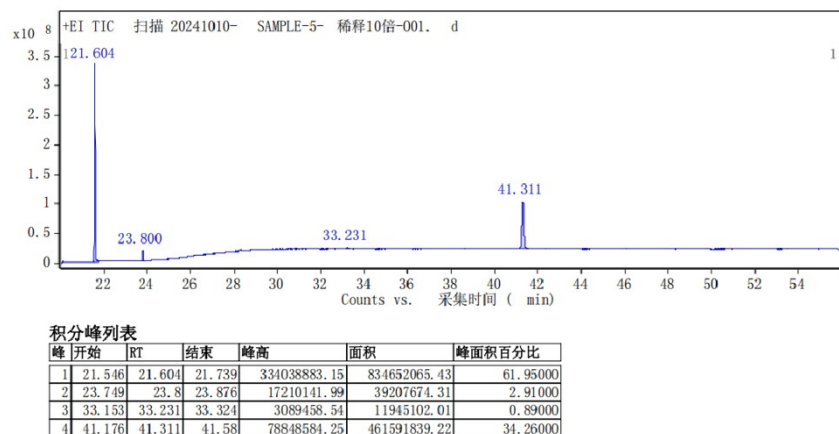

Fig. S27 GC spectra using EtOAc as solvent (entry 11, Table 1)

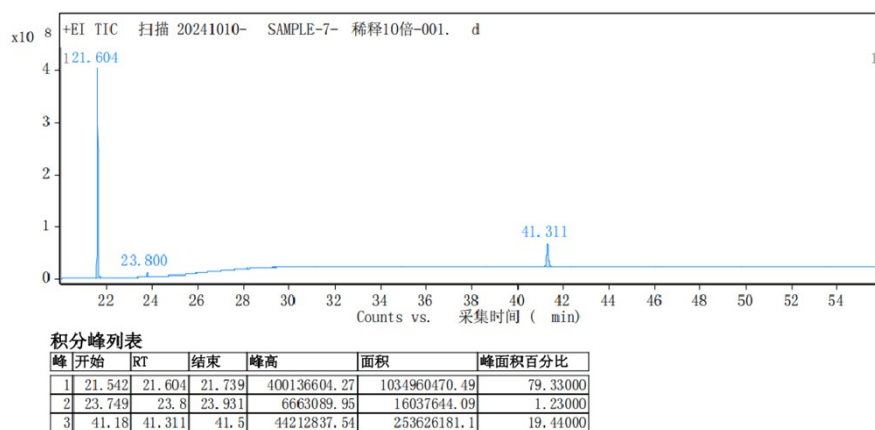

Fig. S28 GC spectra using CH<sub>3</sub>CN as solvent (entry 12, Table 1)

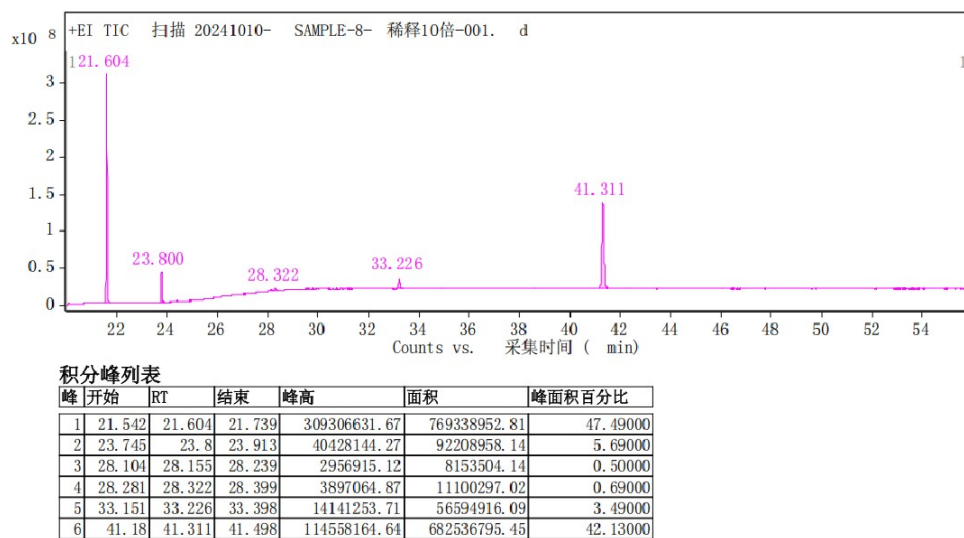

Fig. S29 GC spectra using 1,2-DCE as solvent (entry 13, Table 1)

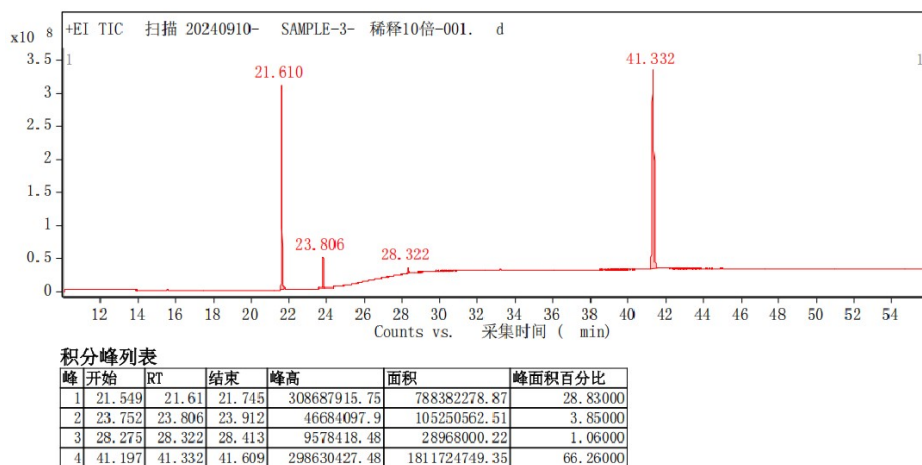

Fig. S30 GC spectra using MeOH as solvent (entry 14, Table 1)

(a) Gram scale synthesis

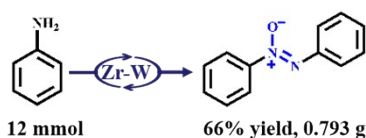

(b) Performance comparison

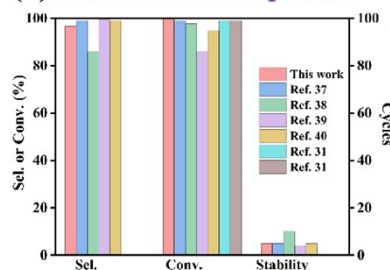

(c) Detailed comparison

| Ent ry | Sel.  | Conv.         | Stability | Main product                    | Catalytic method                    | Catalyst                                                         | Ref.                                          |
|--------|-------|---------------|-----------|---------------------------------|-------------------------------------|------------------------------------------------------------------|-----------------------------------------------|
| 1      | 96.7% | 100%          | 5 cycles  | azoxybenzene                    | Thermocatalysis                     | Zr-W                                                             | This work                                     |
| 2      | 99.9% | 99.9%         | 5 cycles  | azobenzene                      | Ultrasound-assisted thermocatalysis | {CoMo <sub>6</sub> } and additives                               | 37. Sep. Purif. Technol. 2025, 365 132687     |
| 3      | 99%   | 99%           |           |                                 |                                     | {CoMo <sub>6</sub> }                                             |                                               |
| 4      | 86.0% | 97.7%         | 10 cycles | nitrosobenzene                  | Thermocatalysis                     | {Ce <sub>3</sub> (GeW <sub>9</sub> ) <sub>2</sub> }              | 38. Inorg. Chem. Commun. 2023, 154, 110912    |
| 5      | 86.0% | 99.4%         | 4 cycles  | azoxybenzene                    | Thermocatalysis                     | {Ni <sub>6</sub> PW <sub>9</sub> }                               | 39. Chin. Chem. Let. 2024, 35, 108324         |
| 6      | 99%   | 94.7% (yield) | 5 cycles  | azobenzene                      | Thermocatalysis                     | {Rh <sub>4</sub> As <sub>4</sub> W <sub>40</sub> } and additives | 40. Chem. Commun. 2022, 58, 9902              |
| 7      | /     | 99% (yield)   | /         | azobenzene (CH <sub>3</sub> OH) | Thermocatalysis                     | {Mo <sub>6</sub> O <sub>19</sub> } and additives                 | 31. Angew. Chem. Int. Ed. 2021, 60, 6382–6385 |
| 8      | /     | 90% (yield)   | /         | azoxybenzene (MTBE)             |                                     |                                                                  |                                               |

Fig. S31 (a) Gram scale synthesis. (b,c) Comparison of catalytic performance of different polyoxometalate catalysts as reported.

Table S3 Optimization of the reaction conditions.

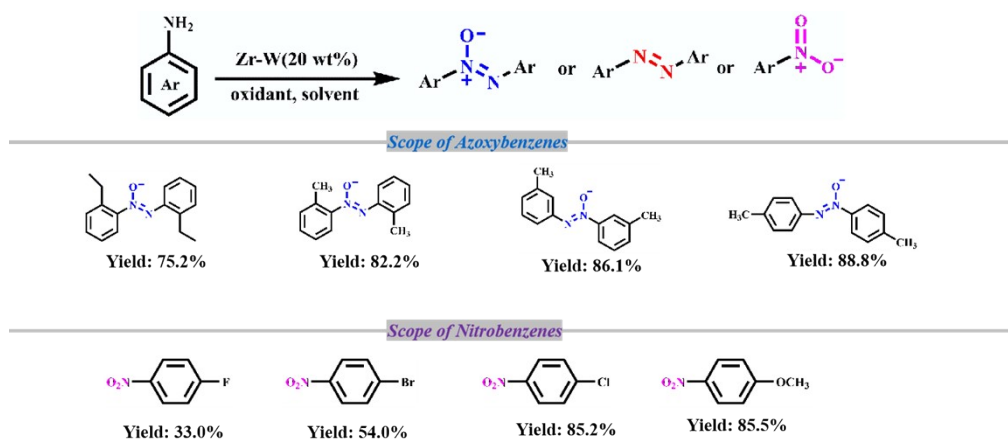

## S7 Mechanistic studies

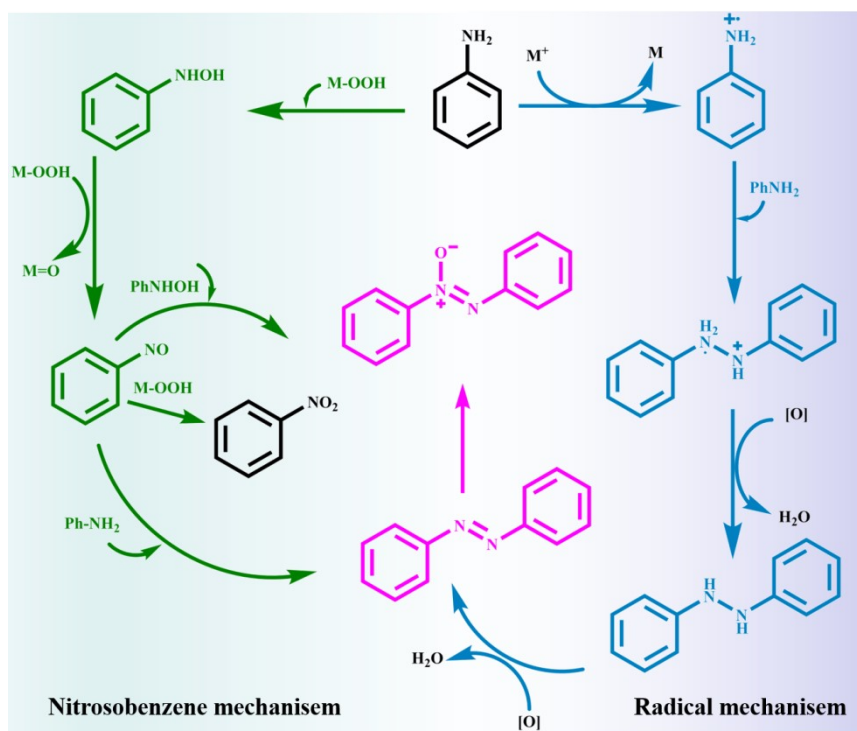

Fig. S32 Schematic diagram of aniline oxidation mechanisms: nitrosobenzene mechanism and radical mechanism.

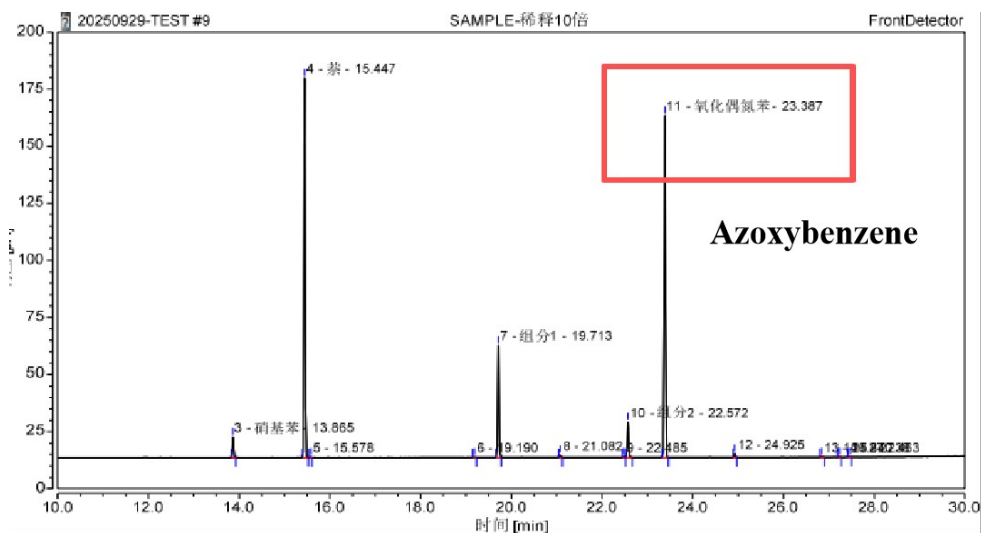

Fig. S33 GC analysis of reaction with BHT.

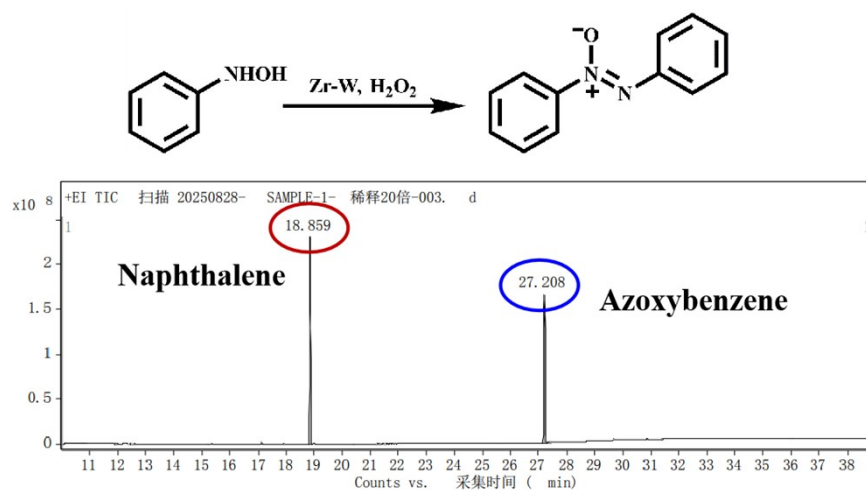

Fig. S34 Reaction process with hydroxylamine as substrate.

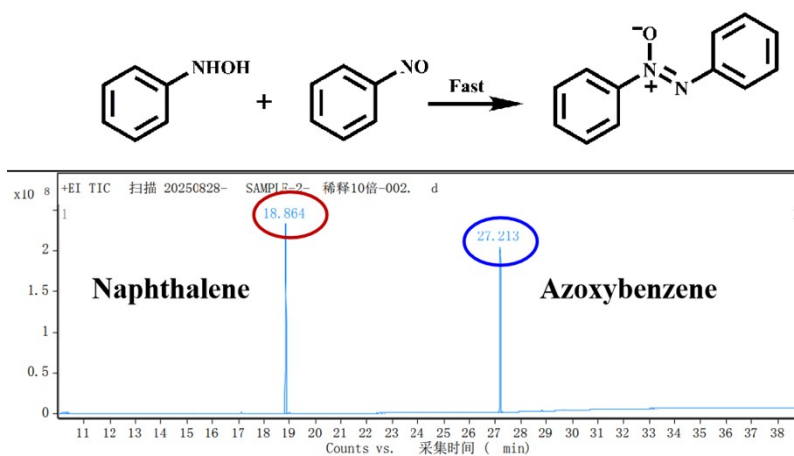

Fig. S35 Reaction process with hydroxylamine and nitrosobenzene as substrate.

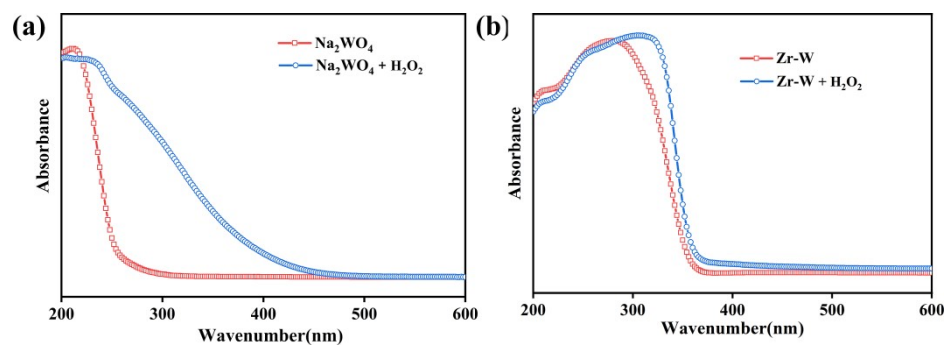

Fig. S36 UV-vis spectra of different samples.

## S8 Reference

- [S1] P. J. Domaille, G. Hervéa and A. Téazéa, in *Inorganic Syntheses*, ed. A. P. Ginsberg, Wiley, 1st edn., 1990, **27**, 96-104.
- [S2] O.V. Dolomanov, L. J. Bourhis, R.J. Gildea, J.A.K. Howard and H. Puschmann, *J. Appl. Cryst.*, 2009, **42**, 339-341.
- [S3] G.M. Sheldrick, *Acta Cryst.*, 2015, **A71**, 3-8.
- [S4] S. Ardizzone and C. L. Bianchi, *Appl. Surf. Sci.*, 1999, **152**, 63-69.
- [S5] G. Bakradze, L. P. H. Jeurgens and E. J. Mittemeijer, *J. Phys. Chem. C*, 2011, **115**, 19841-19848.
- [S6] Q. Zhu, H. An, T.-Q. Xu, Y. Chen, Y. Wei and H. Sun, *ACS Sustainable Chem. Eng.*, 2024, **12**, 1655-1665.
- [S7] Y. Kamiura, K. Umezawa, Y. Teraoka and A. Yoshigoe, *Mater. Trans.*, 2016, **57**, 1609-1614.
- [S7] M. Lee, S. Kim and D.-H. Ko, *Appl. Surf. Sci.*, 2018, **443**, 131-137.
- [S9] X. Xu, J. Zhang, Z. Zhang, G. Lu, W. Cao, N. Wang, Y. Xia, Q. Feng and S. Qiao, *Nano-Micro Lett.*, 2024, **16**, 116.
- [S10] S.-W. Li, Z. Yang, R.-M. Gao, G. Zhang and J. Zhao, *Appl. Catal. B: Environ.*, 2018, **221**, 574-583.
